# Supplementary material for: Early diversification and karyotype evolution of flowering plants
Source: Research Square preprint supplement (doi:10.21203/rs.3.rs-1410884/v1), 2022-03-24
Supplement: Supplementary file 3 [file bd1b7ba60e57ef76be240ff5.xlsx]

## Sheet: Table S1
Supplementary Table 1. Summary of contig level assembly of A. gramineus and I. verum
	A. gramineus		I. verum
	Size (MB)	Number	Size (MB)	Number
N90	17.94	11	2.48	1253
N50	35.55	5	10.68	335
Longest	48.59	-	61.66	-
Shortest	16.65	-	0.003	-
Total contigs	380.61	14	12495.2	5656
Short reads mapping rate	-		0.9985

## Sheet: Table S2
Supplementary Table 2. Gene data sets used for comparative genomic analysis.
Species	Version	Data source/ GenBank accession number
Vitis vinifera	V1.1	http://www.grapegenomics.com/pages/VvCabSauv/
Aquilegia coerulea	V3.1	https://phytozome.jgi.doe.gov
Ceratophyllum demersum	V1.0	https://genomevolution.org/CoGe/
Cinnamomum kanehirae	V1.0	https://www.ncbi.nlm.nih.gov/
Liriodendron chinense	V1.0	https://ngdc.cncb.ac.cn/
Aristolochia fimbriata	V1.0	https://ngdc.cncb.ac.cn/
Elaeis guineensis	V5.1	http://palmxplore.mpob.gov.my/palmXplore/
Asparagus setaceus	V1.0	https://datadryad.org/
Acanthochlamys bracteata	V1.0	unpublish
Dioscorea alata	V2.1	https://phytozome.jgi.doe.gov
Ananas comosus	V1.0	https://phytozome.jgi.doe.gov
Spirodela polyrhiza	V3.0	https://www.ncbi.nlm.nih.gov/
Nymphaea colorata	V1.0	https://ngdc.cncb.ac.cn/
Amborella trichopoda	V6.1	https://genomevolution.org/coge/
Ginkgo biloba	V1.0	https://ngdc.cncb.ac.cn/
Sequoiadendron giganteum	V2.0	https://treegenesdb.org/
Azolla filiculoides	V1.1	https://www.fernbase.org/
Selaginella moellendorffii	V1.0	https://phytozome.jgi.doe.gov
Physcomitrium patens	V3.3	https://phytozome.jgi.doe.gov

## Sheet: Table S3
Supplementary Table 3: Summary of DNA sequencing data.
Species	Library type	Platform	Total Data (Gb)	Total Reads Number	Depth (X)
I. verum	HIFI	PacBio	582.53	37392403	46
	Hi-C	Illumina NovaSeq	1436.32	9575782586	110
	Short reads	MGISEQ-2000	402.91	2686084540	32
A. gramineus.	Nanopore	PromethION	78.54	2694207	148
	Hi-C	Illumina NovaSeq	76.8	362595252	145
	Short reads	Illumina NovaSeq	56.87	379169394	143

## Sheet: Table S4
Supplementary Table 4: Summary of RNA sequencing data.
Species	Platform		Tissue	Total Reads Number	Total Data (Gb)
A. gramineus.		MGI-2000	flower_1	45834830	6.8
		MGI-2001	flower_2	47065498	7.1
		MGI-2002	flower_3	46555832	7
		MGI-2003	flower_4	43820362	6.6
		MGI-2004	leaf_1	46616196	7
		MGI-2005	leaf_2	46363650	7
		MGI-2006	leaf_3	46746106	7.1
		MGI-2007	leaf_4	47603858	6
		MGI-2008	root_1	39788446	6
		MGI-2009	root_2	46385216	7
		MGI-2010	root_3	46522886	7
		MGI-2011	root_4	42740884	6.4
		MGI-2012	stem_1	44947678	6.7
		MGI-2013	stem_2	46376794	6.9
		MGI-2014	stem_3	45285470	6.7
		MGI-2015	stem_4	47399364	7.1
		MGI-2016	petiole1	46201308	6.9
		MGI-2017	petiole2	46939190	7
		MGI-2018	petiole3	44920562	6.7
		MGI-2019	petiole4	46893284	7
		MGI-2020	Whole seedlings_1	46727038	7
		MGI-2021	Whole seedlings_2	47278086	7.1
I. verum		MGI-2000	fruit_1	40784120	4.7
		MGI-2000	fruit_2	41491744	4.8
		MGI-2000	fruit_3	42095418	4.8
		MGI-2000	young flower_1	40915706	4.7
		MGI-2000	young flower_2	40363334	4.6
		MGI-2000	young flower_3	40711662	4.7
		MGI-2000	leaf_1	45061400	6.5
		MGI-2000	leaf_2	45113498	6.5
		MGI-2000	leaf_3	45126778	6.5
		MGI-2000	phloem_1	45218982	6.5
		MGI-2000	phloem_2	45725270	6.6
		MGI-2000	phloem_3	42963138	6.1
		MGI-2000	xylem_1	45435746	6.5
		MGI-2000	xylem_2	45839376	6.6
		MGI-2000	xylem_3	45988300	6.6
		MGI-2000	root_1	45758482	6.5
		MGI-2000	root_2	45523884	6.5
		MGI-2000	root_3	45767788	6.6
		MGI-2000	stem_1	40904948	4.8
		MGI-2000	stem_2	41386282	4.9
		MGI-2000	stem_3	41000190	4.8

## Sheet: Table S5
Supplementary Table 5: Summary of the functional annotation of predicted genes in A. gramineus and I. verum
Database	A. gramineus		I. verum
	Number	Percentage (%)	Number number	Percentage (%)
Swiss-prot	16380	68.43	32762	68.1
Nr	21486	89.75	39539	82.19
InterPro	23064	96.34	37447	77.84
GO	15956	66.65	23036	47.88
KEGG Pathway	7655	31.97	4406	9.16
Total	23939	100	40181	83.52

## Sheet: Table S6
Supplementary Table 6: Benchmarking Universal Single Copy Orthologs (BUSCO) analysis about A. gramineus and I. verum
Species	Description	Genome model		Protein model
		Number of genes	Percentage (%)	Number of genes	Percentage (%)
A. gramineus	Complete BUSCOs	1561	96.7	1500	92.9
	Complete and single-copy BUSCOs	1505	93.2	1448	89.7
	Complete and duplicated BUSCOs	56	3.5	52	3.2
	Fragmented BUSCOs	16	1.0	21	1.3
	Missing BUSCOs	37	2.3	93	5.8
I. verum	Complete BUSCOs	751	46.6	1537	95.2
	Complete and single-copy BUSCOs	695	43.1	1385	85.8
	Complete and duplicated BUSCOs	56	3.5	152	9.4
	Fragmented BUSCOs	240	14.9	39	2.4
	Missing BUSCOs	623	38.5	38	2.4

## Sheet: Table S7
Supplementary Table 7: Classification of repetitive elements in I. verum and A. gramineus genome.
Repeat type	I. verum		A. gramineus
	Repeat size (bp)	Percentage of genome (%)	Repeat size (bp)	Percentage of genome (%)
SINEs	9942	7.96e-07	0	0
LINEs	619973858	4.96	5227226	1.37
LTR/Gypsy	2138178520	17.11	61947499	16.27
LTR/Copia	3776457105	30.22	15132514	3.97
DNA elements	929296551	7.44	5920395	1.56
Unclassified	2411568160	19.3	141030678	37.05
Simple repeats	800256356	6.4	4111325	1.08
total	10675740492	85.44	233369637	58.81
